# Supplementary material for: Anthropometric Determinants of Respiratory Sinus Arrhythmia in Children
Source: MDPI journal article supplement (doi:10.3390/ijerph19010566), 2022-01-05
Supplement: s1 [file s1]

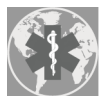

Article

# Anthropometric Determinants of Respiratory Sinus Arrhythmia in Children

Paulina Lubocka <sup>1,\*</sup>, Robert Sabiniewicz <sup>1</sup>, Klaudia Suligowska <sup>2,3</sup> and Tomasz Zdrojewski <sup>2</sup>

<sup>1</sup> Department of Pediatric Cardiology and Congenital Heart Disease, Medical University of Gdańsk, Dębinki Street 7, 80-952 Gdańsk, Poland; sabini@gumed.edu.pl

<sup>2</sup> Department of Preventive Medicine and Education, Medical University of Gdańsk, Dębinki Street 7, 80-952 Gdańsk, Poland; klaudia.suligowska@gumed.edu.pl (K.S.); tz@gumed.edu.pl (T.Z.)

<sup>3</sup> Department of Dental Techniques and Masticatory System Dysfunctions, Medical University of Gdańsk, Tuwima Street 15, 80-210 Gdańsk, Poland

\* Correspondence: paulinalubocka@gumed.edu.pl

**Citation:** Lubocka, P.; Sabiniewicz, R.; Suligowska, K.; Zdrojewski, T. Anthropometric Determinants of Respiratory Sinus Arrhythmia in Children. *Int. J. Environ. Res. Public Health* **2022**, *19*, 566.  
<https://doi.org/10.3390/ijerph19010566>

Academic Editor: Bożena Werner

Received: 26 October 2021

Accepted: 31 December 2021

Published: 5 January 2022

**Publisher's Note:** MDPI stays neutral with regard to jurisdictional claims in published maps and institutional affiliations.

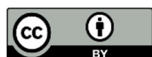

**Copyright:** © 2022 by the authors. Licensee MDPI, Basel, Switzerland. This article is an open access article distributed under the terms and conditions of the Creative Commons Attribution (CC BY) license (<http://creativecommons.org/licenses/by/4.0/>).

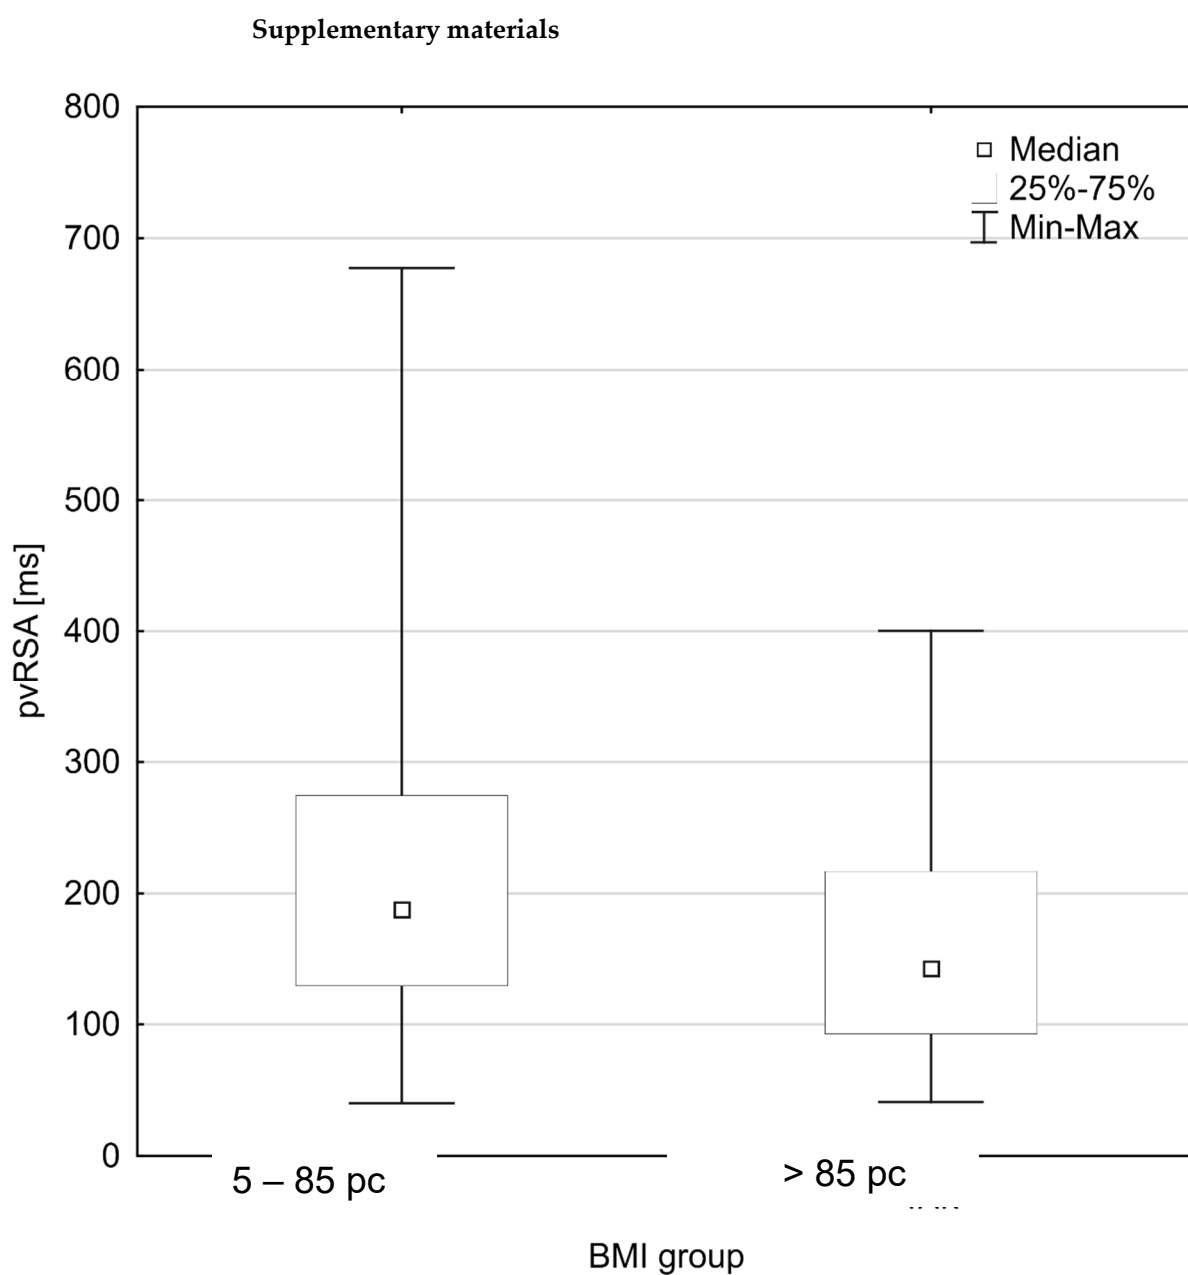

**Figure S1.** A box-plot showing pvRSA in subjects with normal-weight students (5–85 pc of BMI) compared to the group with overweight and obesity (BMI > 85 pc). The difference was statistically significant ( $p < 0.001$ ).

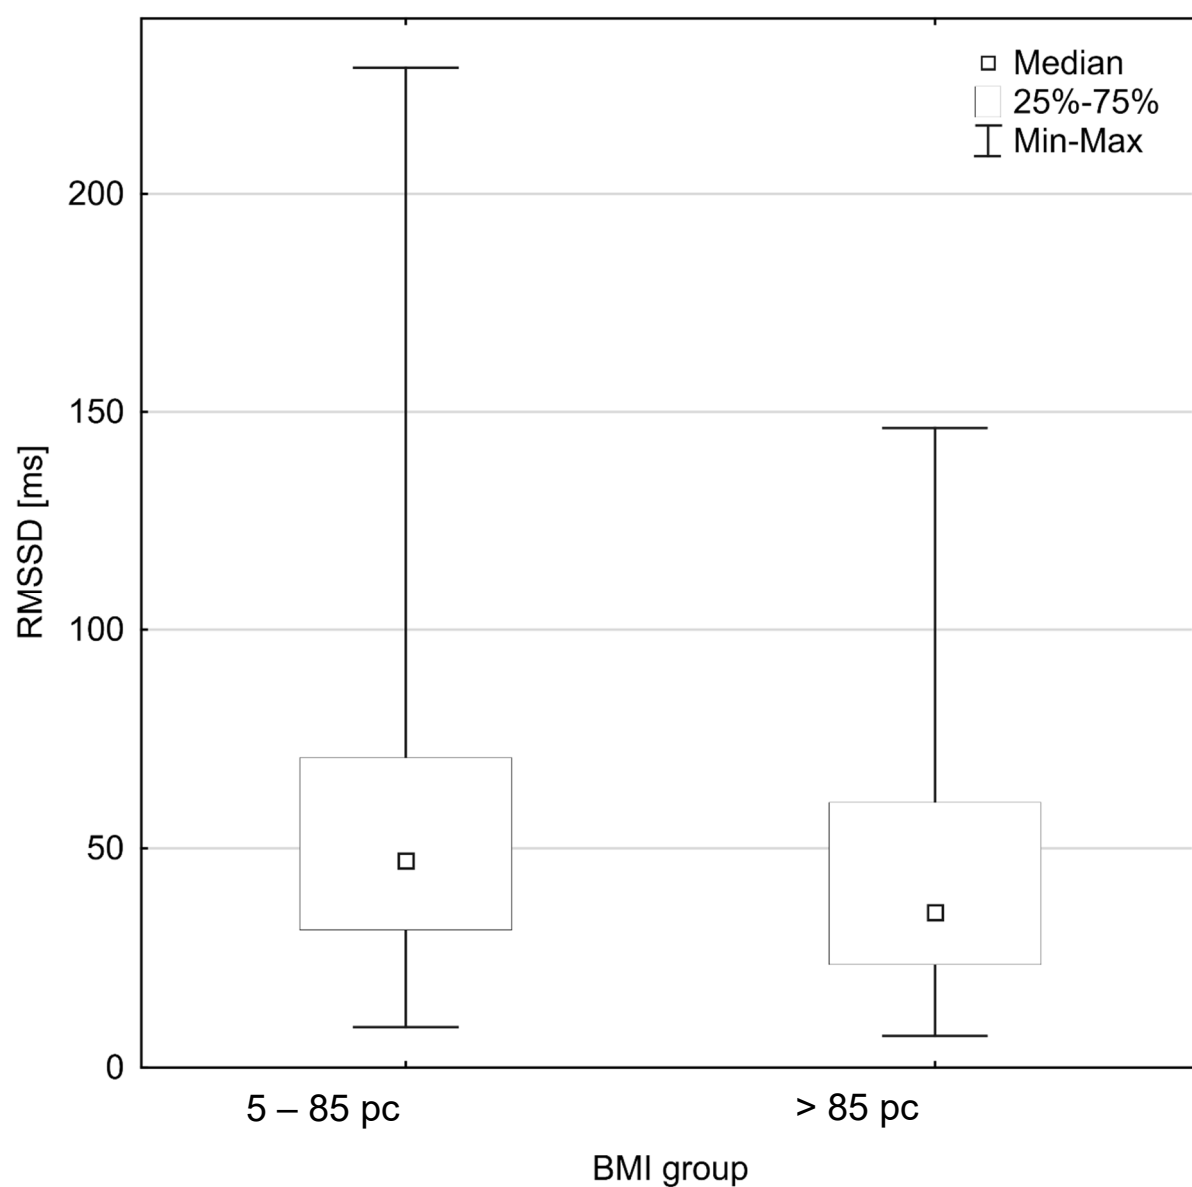

**Figure S2.** A box-plot showing RMSSD in subjects with normal-weight students (5–85 pc of BMI) compared to the group with overweight and obesity (BMI > 85 pc). The difference was statistically significant ( $p < 0.001$ ).

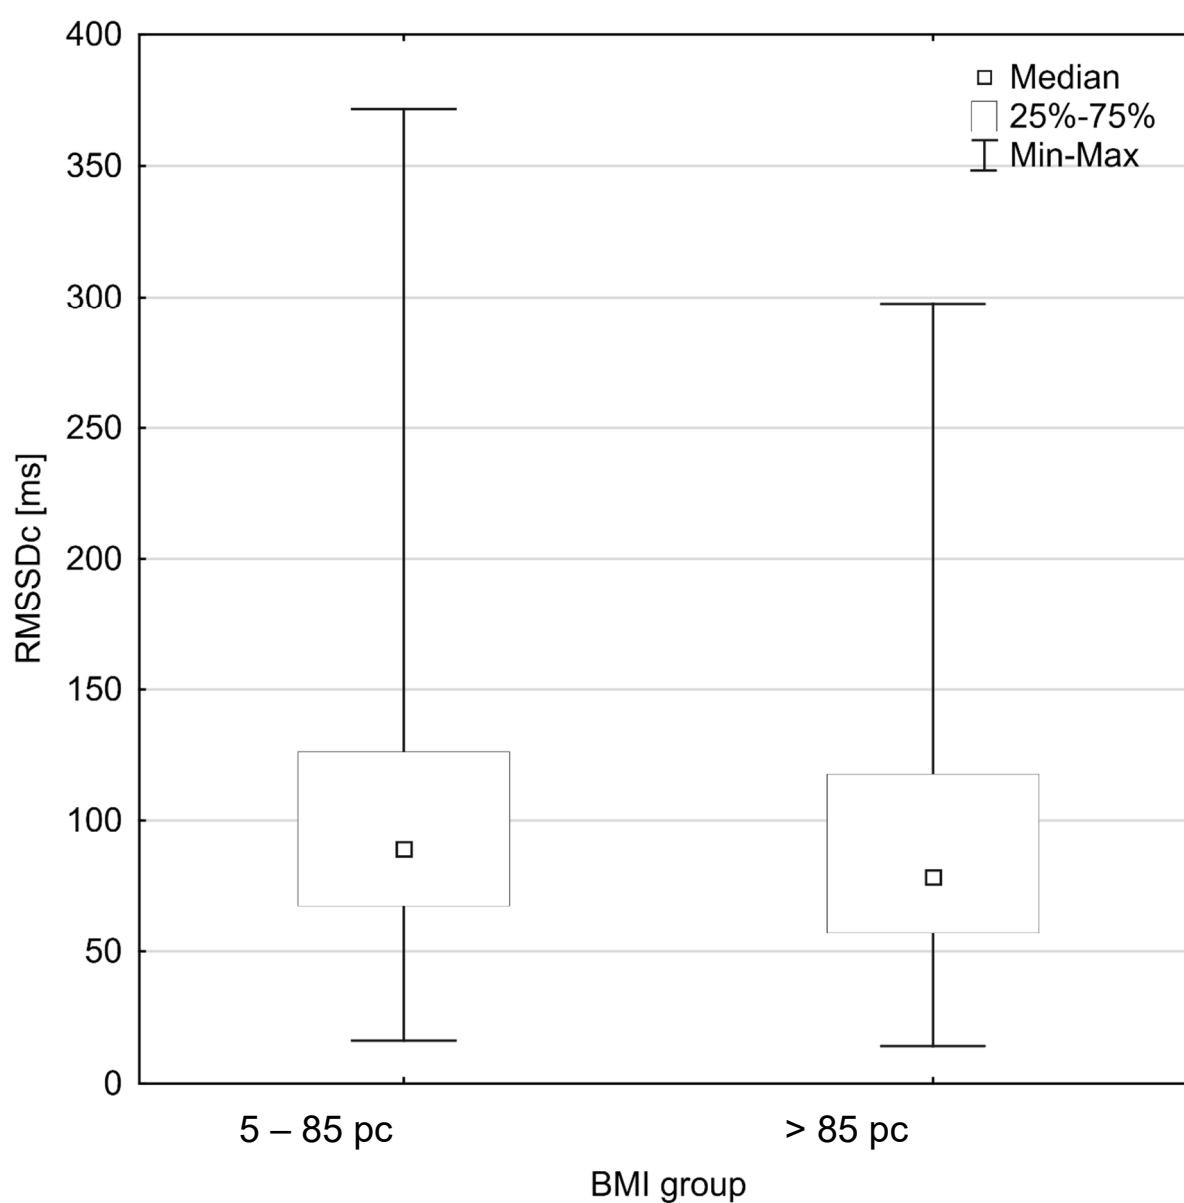

**Figure S3.** A box-plot showing RMSSDc in subjects with normal-weight students (5–85 pc of BMI) compared to the group with overweight and obesity (BMI > 85 pc). No substantial difference between the groups was reported ( $p = 0.059$ ).

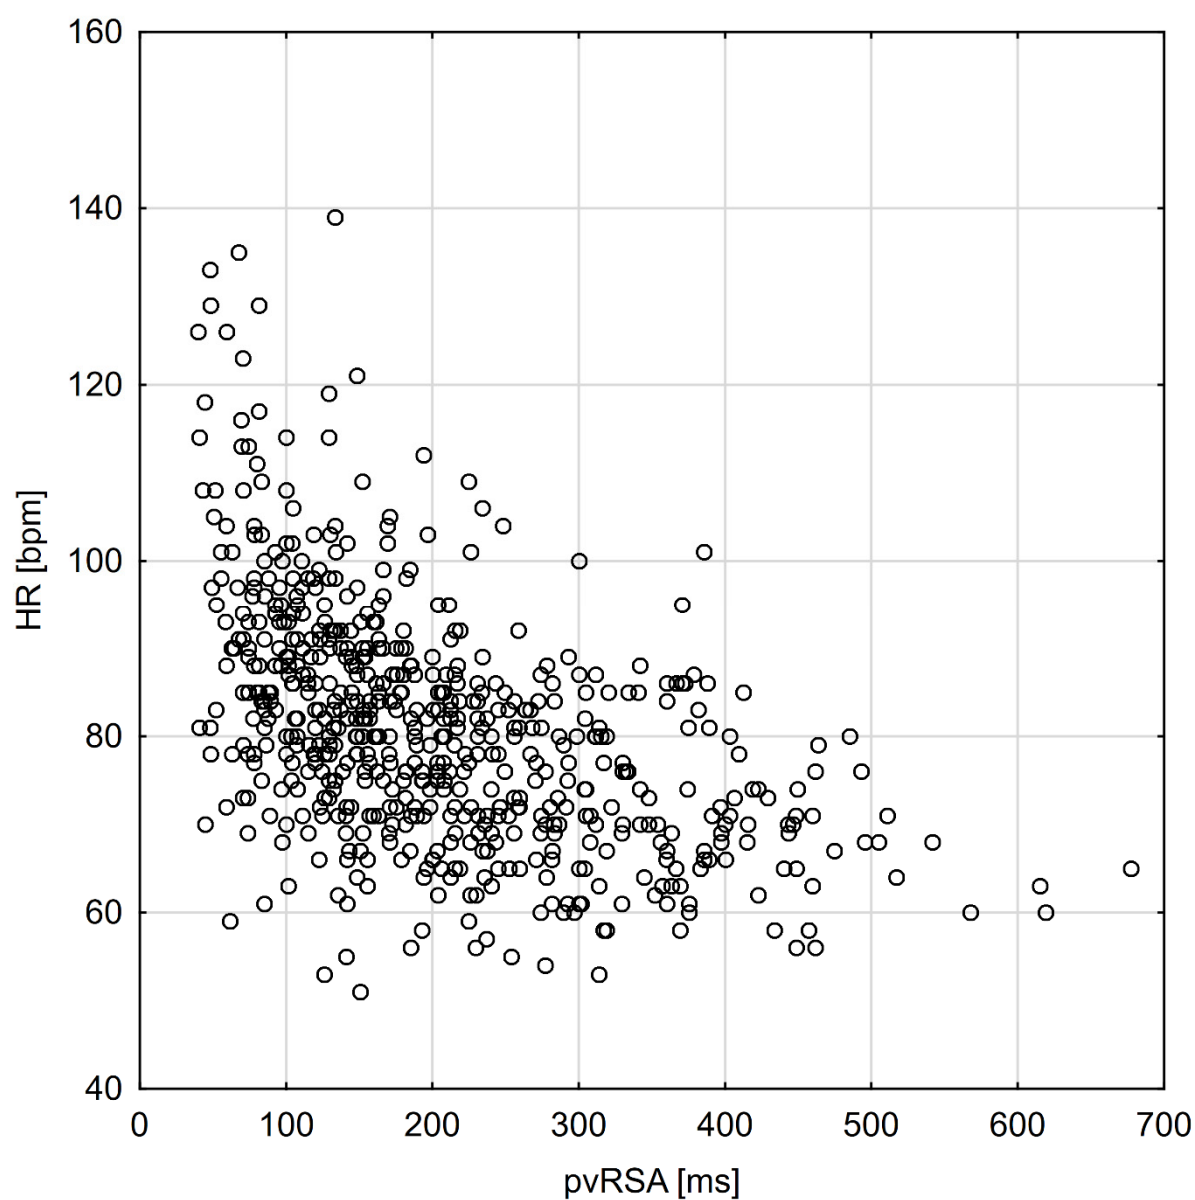

**Figure S4.** A scatter chart showing interdependence between heart rate and pvRSA. A substantial correlation was observed ( $r = -0.52$ ).

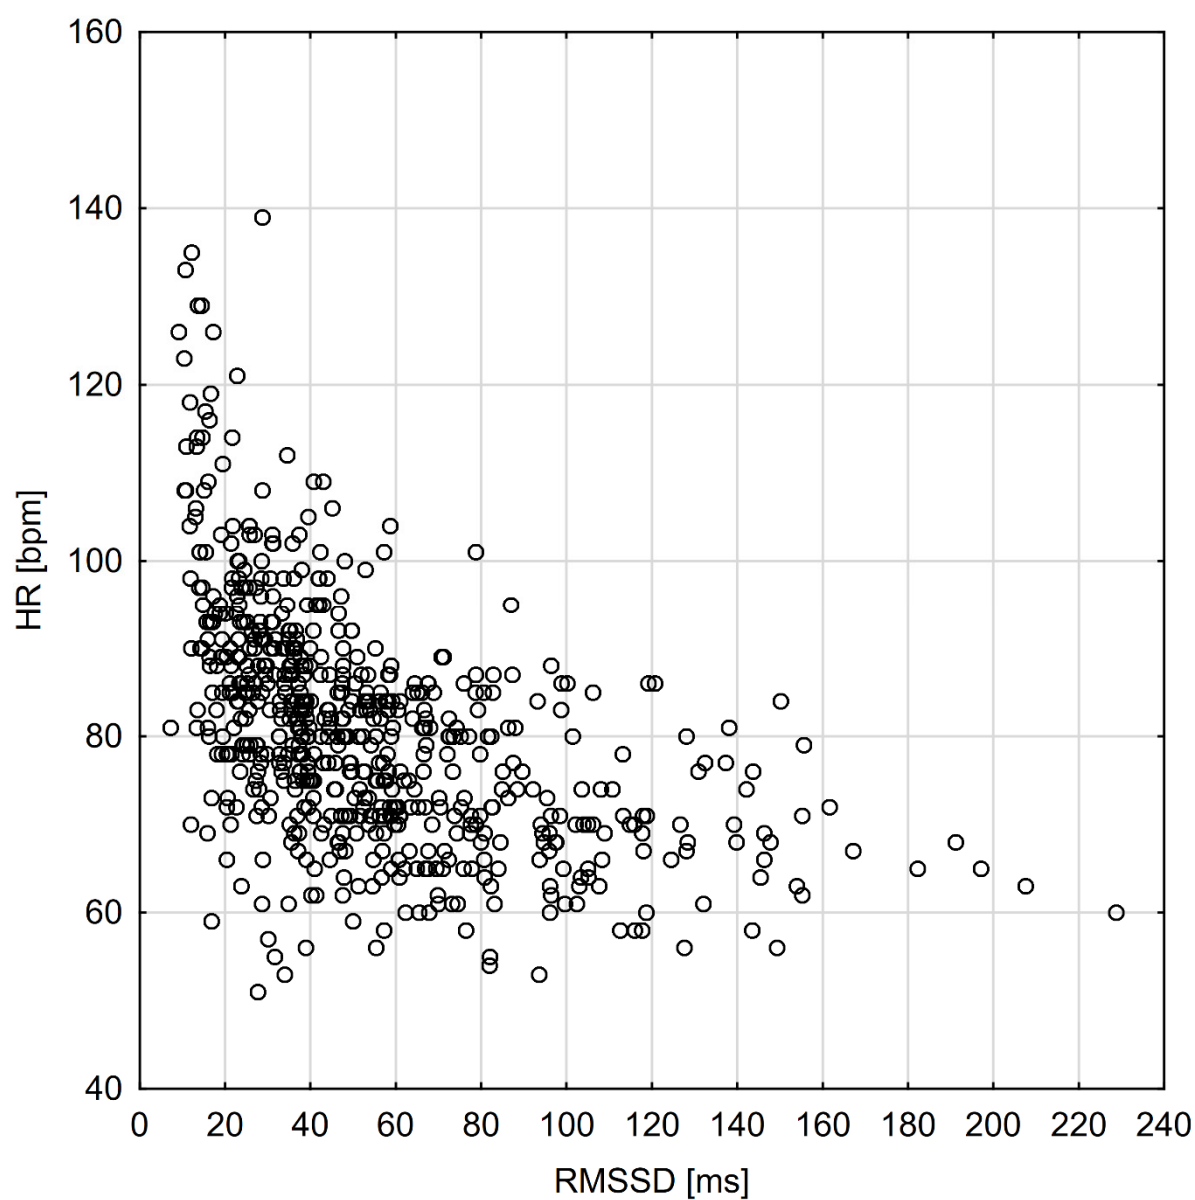

**Figure S5.** A scatter chart showing interdependence between heart rate and RMSSD. A substantial correlation was observed ( $r = -0.58$ ).

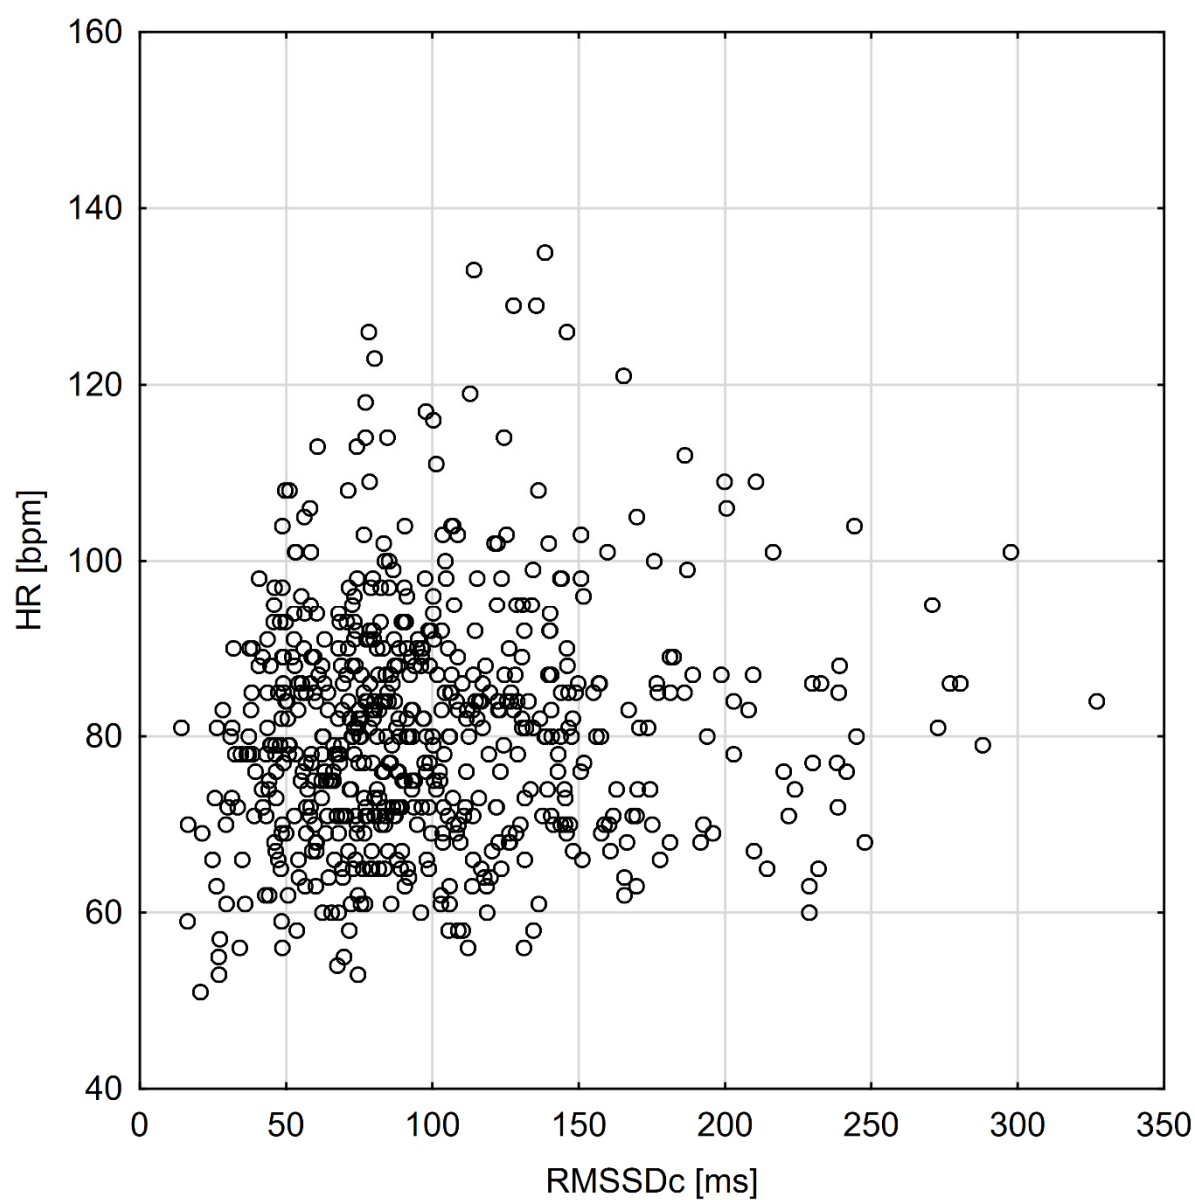

**Figure S6.** A scatter chart showing interdependence between heart rate and RMSSDc. No important correlation was observed between the variables.
